# Supplementary material for: Snowpack dynamics in the Lebanese mountains from quasi-dynamically downscaled ERA5 reanalysis updated by assimilating remotely sensed fractional snow-covered area
Source: Copernicus journal article supplement (doi:10.5194/hess-25-4455-2021), 2021-08-19
Supplement: Supplementary file 1 [file hess-25-4455-2021-supplement.zip]

Archive with 2 entries (2 files):
- suplement.png
- hess-25-4455-2021-supplement-title-page.pdf
