# Supplementary material for: Snowpack dynamics in the Lebanese mountains from quasi-dynamically downscaled ERA5 reanalysis updated by assimilating remotely sensed fractional snow-covered area
Source: Copernicus journal article supplement (doi:10.5194/hess-25-4455-2021), 2021-08-19
Supplement: Supplementary file 1 [file hess-25-4455-2021-supplement.zip › hess-25-4455-2021-supplement-title-page.pdf]

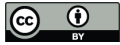

*Supplement of*

**Snowpack dynamics in the Lebanese mountains from quasi-dynamically downscaled ERA5 reanalysis updated by assimilating remotely sensed fractional snow-covered area**

**Esteban Alonso-González et al.**

*Correspondence to:* Esteban Alonso-González (e.alonso@ipe.csic.es)

- hess-25-4455-2021-supplement-title-page.pdf
- suplement.png

The copyright of individual parts of the supplement might differ from the article licence.
