# Supplementary figures and images for: Snowpack dynamics in the Lebanese mountains from quasi-dynamically downscaled ERA5 reanalysis updated by assimilating remotely sensed fractional snow-covered area
Source: Copernicus journal article supplement (doi:10.5194/hess-25-4455-2021), 2021-08-19

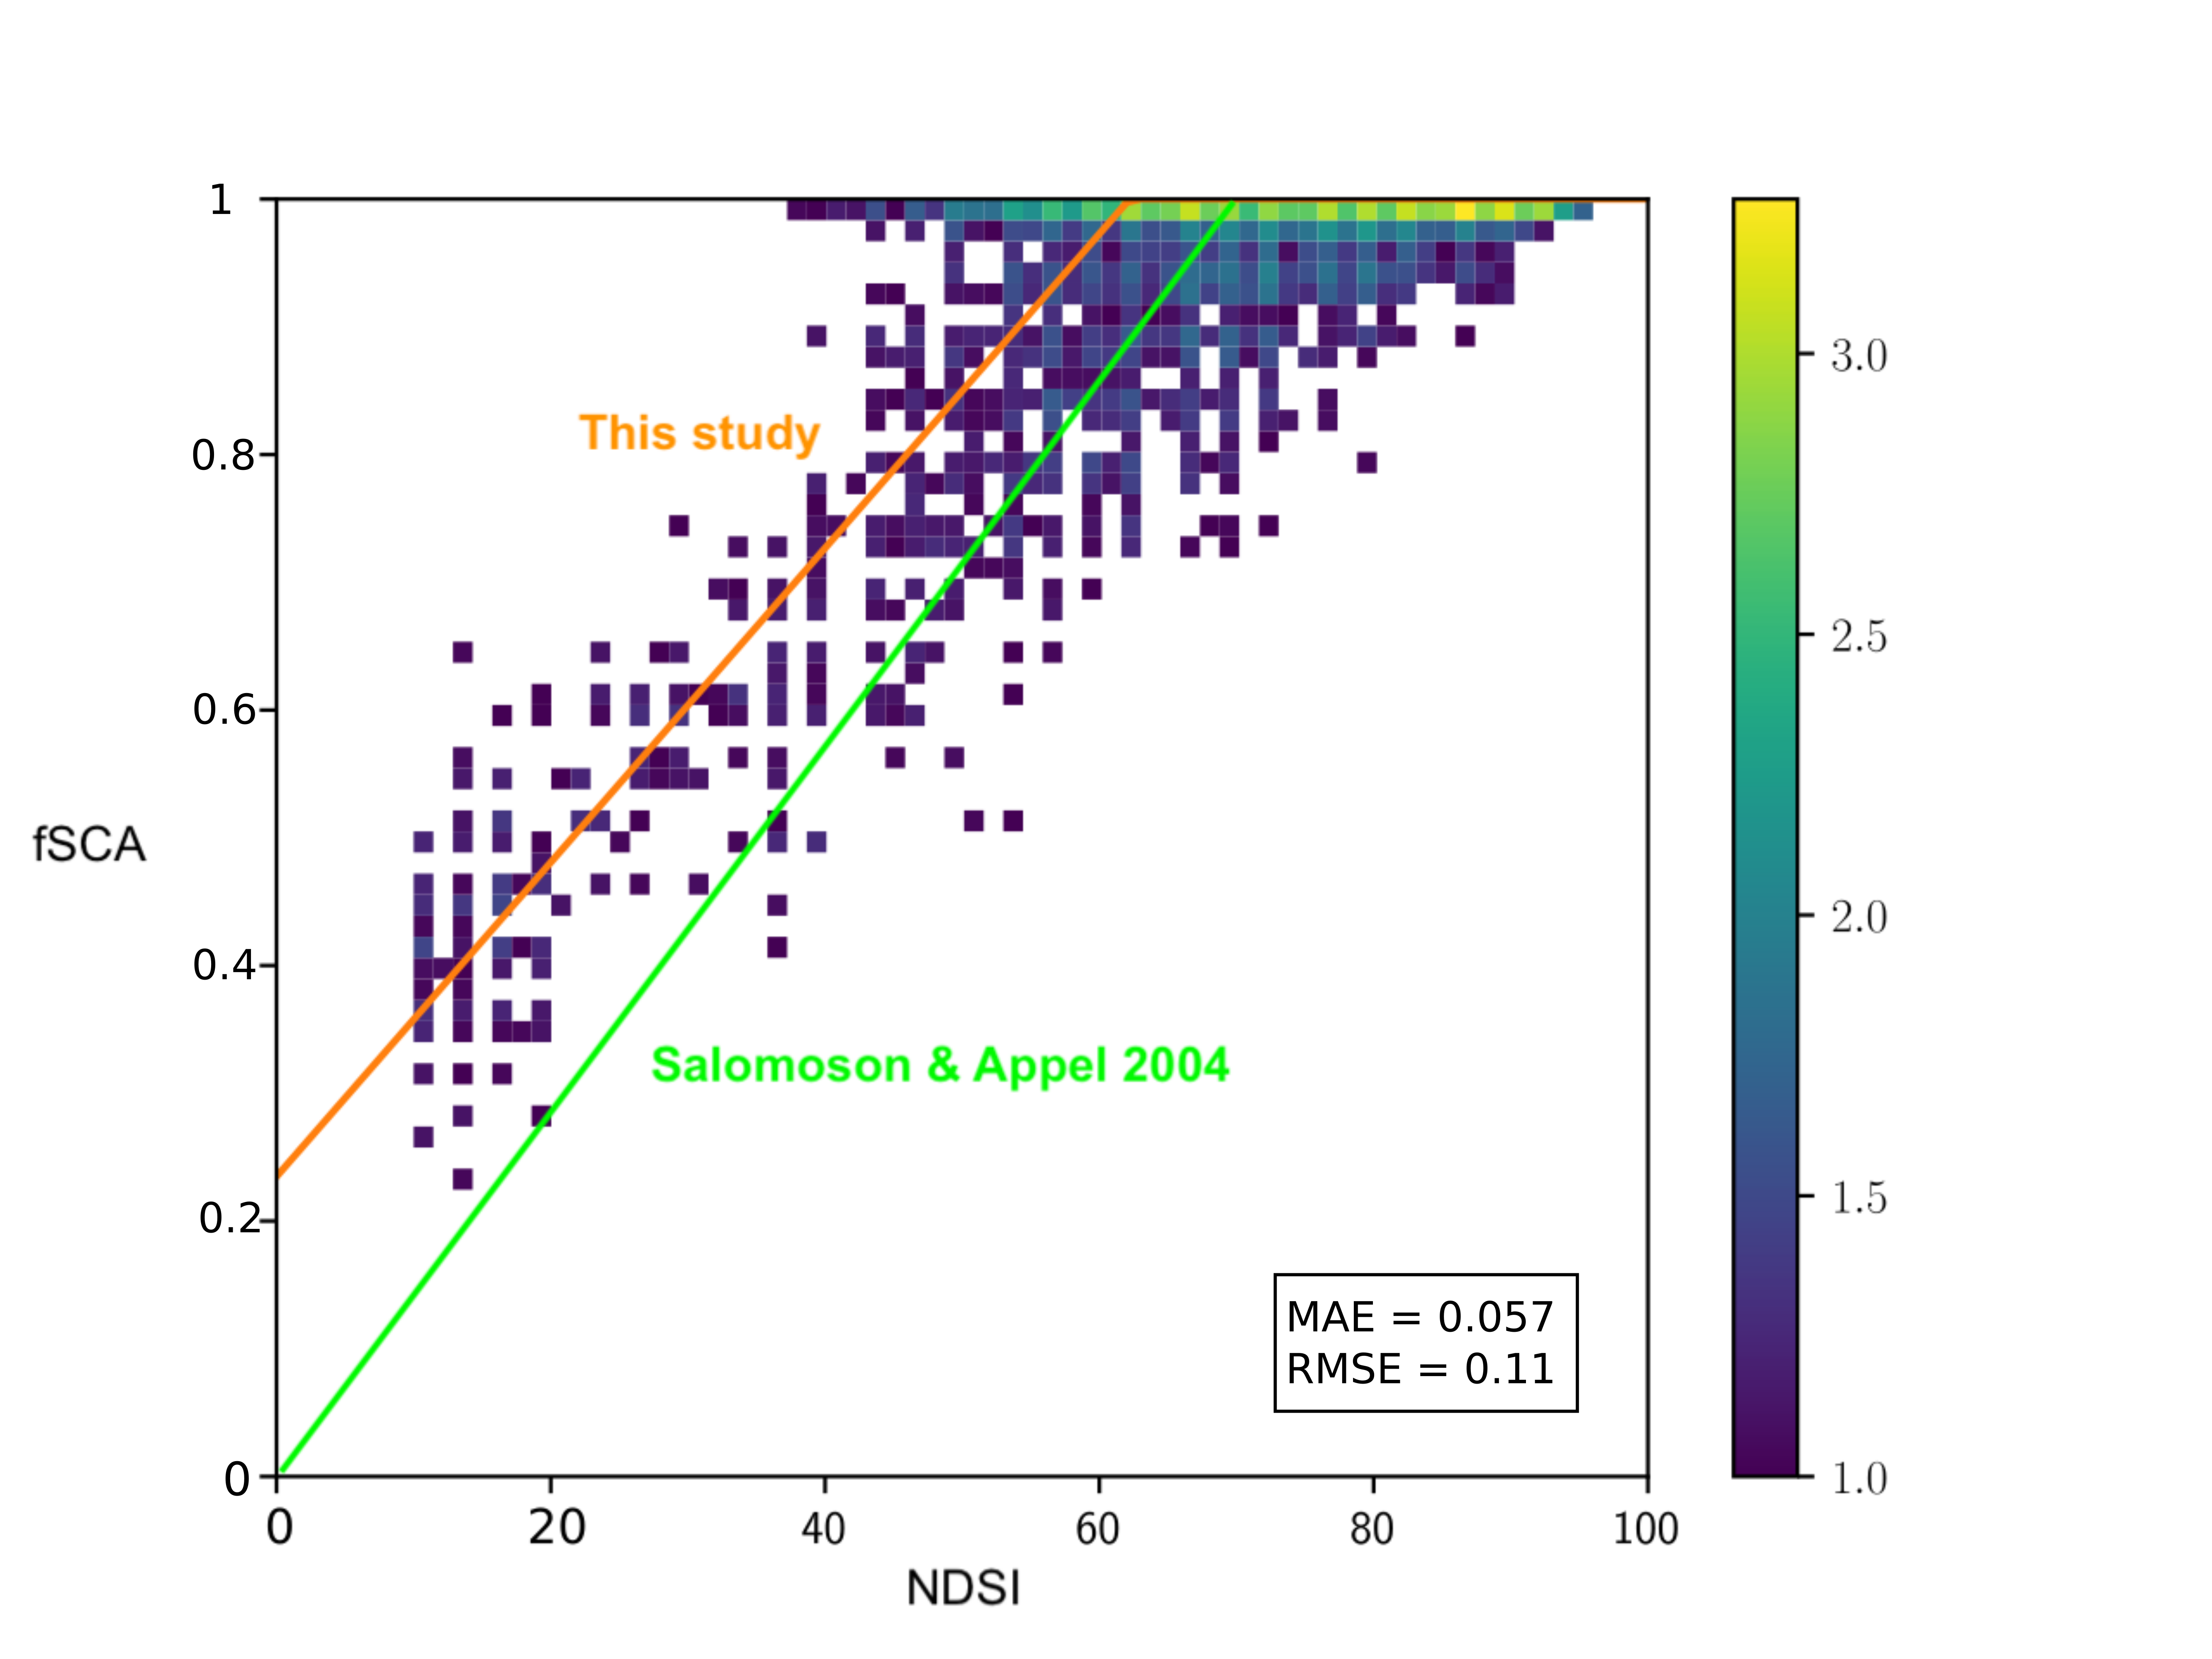

Supplement: Supplementary file 1 [file hess-25-4455-2021-supplement.zip › suplement.png]
